# Supplementary material for: Observer-Agent Kinematic Similarity Facilitates Action Intention Decoding
Source: PubMed Central journal article supplement (PMC7018748; doi:10.1038/s41598-020-59176-z), 2020-02-13
Supplement: 41598_2020_59176_MOESM1_ESM.pdf [file 41598_2020_59176_MOESM1_ESM.pdf]

# **OBSERVER-AGENT KINEMATIC SIMILARITY FACILITATES ACTION INTENTION DECODING**

Doriana De Marco, Emilia Scalona, Maria Chiara Bazzini, Pietro Avanzini, Maddalena Fabbri-Destro

**SUPPLEMENTARY MATERIAL S1-S2-S3-S4**

|                                        | NON-SOCIAL (BOX) |     |           |     | SOCIAL (HANDS) |     |              |     |
|----------------------------------------|------------------|-----|-----------|-----|----------------|-----|--------------|-----|
|                                        | Big Box          |     | Small Box |     | Big Social     |     | Small Social |     |
| REACH                                  | MEAN             | SE  | MEAN      | SE  | MEAN           | SE  | MEAN         | SE  |
| Amplitude (mm)                         | 471              | 5   | 460       | 3   | 464            | 4   | 451          | 4   |
| Elevation Peak (mm)                    | 200              | 3   | 191       | 2   | 192            | 2   | 186          | 3   |
| Elevation ROM (mm)                     | 162              | 3   | 153       | 2   | 153            | 2   | 148          | 3   |
| Curvature ROM (mm)                     | 93               | 2   | 88        | 2   | 89             | 3   | 80           | 2   |
| Velocity Mean (mm/s)                   | 624              | 8   | 506       | 14  | 591            | 6   | 540          | 5   |
| Velocity Peak (mm/s)                   | 1029             | 12  | 852       | 23  | 1011           | 8   | 947          | 11  |
| Velocity ROM (mm/s)                    | 977              | 11  | 804       | 22  | 964            | 8   | 900          | 11  |
| Acceleration Mean (mm/s <sup>2</sup> ) | 2464             | 45  | 1745      | 98  | 2357           | 73  | 2200         | 59  |
| Acceleration Peak (mm/s <sup>2</sup> ) | 4861             | 117 | 3338      | 217 | 4294           | 151 | 3884         | 135 |
| Acceleration ROM (mm/s <sup>2</sup> )  | 4838             | 118 | 3347      | 190 | 4237           | 141 | 3855         | 138 |
| Deceleration Mean (mm/s <sup>2</sup> ) | 2685             | 99  | 1767      | 89  | 2527           | 65  | 2066         | 47  |
| Deceleration Peak (mm/s <sup>2</sup> ) | 4263             | 163 | 2857      | 144 | 4098           | 143 | 3495         | 125 |
| Deceleration ROM (mm/s <sup>2</sup> )  | 4285             | 176 | 2893      | 165 | 4156           | 161 | 3525         | 128 |
| GRASP                                  | MEAN             | SE  | MEAN      | SE  | MEAN           | SE  | MEAN         | SE  |
| Finger Aperture Peak (mm)              | 75               | 1   | 67        | 1   | 76             | 2   | 70           | 1   |
| Finger Aperture ROM (mm)               | 48               | 1   | 39        | 1   | 49             | 2   | 43           | 1   |
| Finger Velocity Mean (mm/s)            | 101              | 3   | 60        | 3   | 92             | 5   | 73           | 3   |
| Finger Velocity Peak (mm/s)            | 287              | 13  | 170       | 9   | 281            | 17  | 186          | 10  |
| Finger Velocity ROM (mm/s)             | 284              | 13  | 169       | 9   | 279            | 17  | 184          | 10  |
| Acceleration Mean (mm/s <sup>2</sup> ) | 1717             | 55  | 927       | 49  | 1479           | 69  | 1098         | 41  |
| Acceleration Peak (mm/s <sup>2</sup> ) | 7051             | 456 | 4244      | 315 | 7132           | 413 | 4657         | 403 |
| Acceleration ROM (mm/s <sup>2</sup> )  | 7016             | 453 | 4226      | 315 | 7121           | 411 | 4638         | 403 |

**Table S1.** Mean values and SE of the Reach and Grasp parameters calculated from the reference subject movement. Only the parameters which were significantly affected from CONTEX and SIZE factors are reported.

|                                             | NON-SOCIAL (BOX) |     |           |     | SOCIAL (HANDS) |     |              |     |
|---------------------------------------------|------------------|-----|-----------|-----|----------------|-----|--------------|-----|
|                                             | Big Box          |     | Small Box |     | Big Social     |     | Small Social |     |
| <b>REACH</b>                                | MEAN             | SE  | MEAN      | SE  | MEAN           | SE  | MEAN         | SE  |
| <b>Amplitude (mm)</b>                       | 436              | 10  | 435       | 10  | 432            | 9   | 428          | 9   |
| <b>Velocity Peak (mm/s)</b>                 | 1077             | 40  | 1069      | 40  | 1047           | 37  | 1049         | 38  |
| <b>Velocity ROM (mm/s)</b>                  | 1029             | 40  | 1021      | 40  | 998            | 37  | 999          | 37  |
| <b>Acceleration Mean (mm/s<sup>2</sup>)</b> | 3030             | 180 | 2969      | 185 | 2903           | 188 | 2959         | 193 |
| <b>Deceleration Peak (mm/s<sup>2</sup>)</b> | 4627             | 306 | 4625      | 297 | 4405           | 294 | 4468         | 302 |
| <b>Deceleration ROM (mm/s<sup>2</sup>)</b>  | 4814             | 348 | 4729      | 308 | 4504           | 304 | 4564         | 317 |
| <b>GRASP</b>                                | MEAN             | SE  | MEAN      | SE  | MEAN           | SE  | MEAN         | SE  |
| <b>Finger Aperture Peak (mm)</b>            | 75               | 2   | 75        | 2   | 75             | 2   | 74           | 2   |
| <b>Finger Aperture ROM (mm)</b>             | 45               | 2   | 44        | 2   | 45             | 2   | 44           | 2   |
| <b>Finger Velocity Mean (mm/s)</b>          | 102              | 6   | 98        | 5   | 101            | 5   | 99           | 5   |

**Table S2.** Mean values and SE of the Reach and Grasp parameters calculated from all the 21 participants movements. Only the parameters which were significantly affected from CONTEX and SIZE factors are reported.

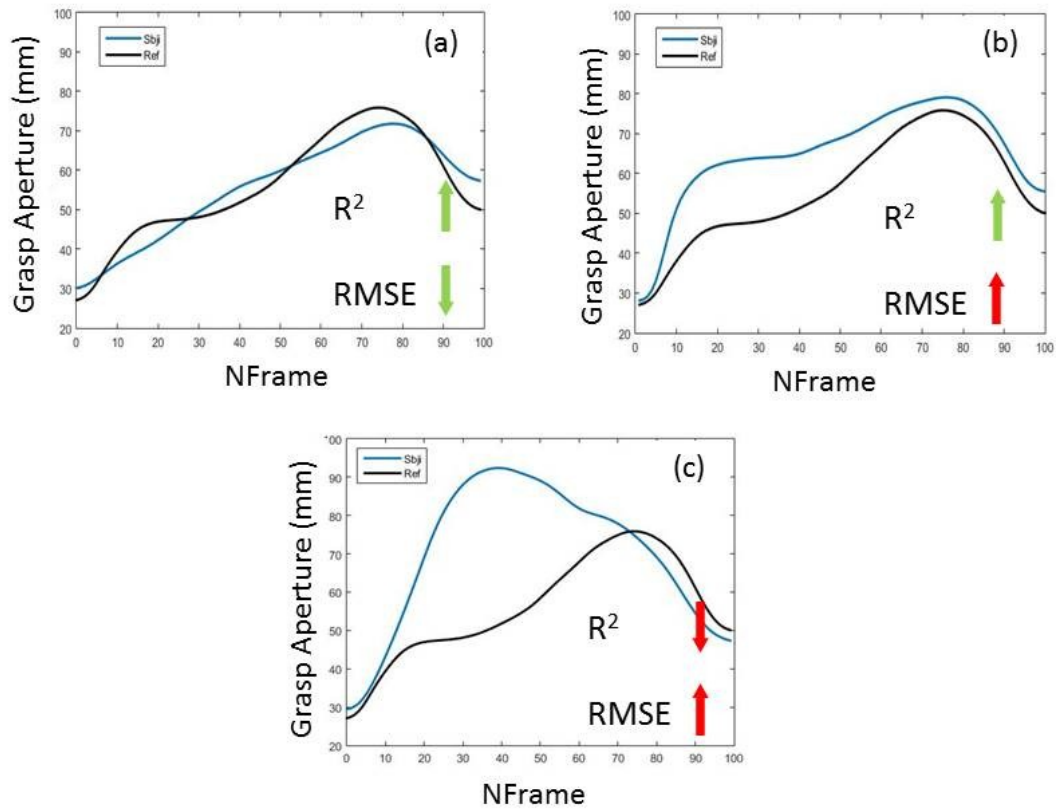

**Figure S3.** Exemplar combinations of  $R^2$  and RMSE distribution. Panel A reports two highly similar profile, returning high  $R^2$  and low RMSE values. Panel B reports two profiles following a similar pattern, but detaching one from the other, thus maintaining a high  $R^2$  values, but a higher RMSE value. Finally, Panel C reports two profiles highly different both in amplitude and in temporal pattern. This is the worst case, in which  $R^2$  is low and RMSE is high.

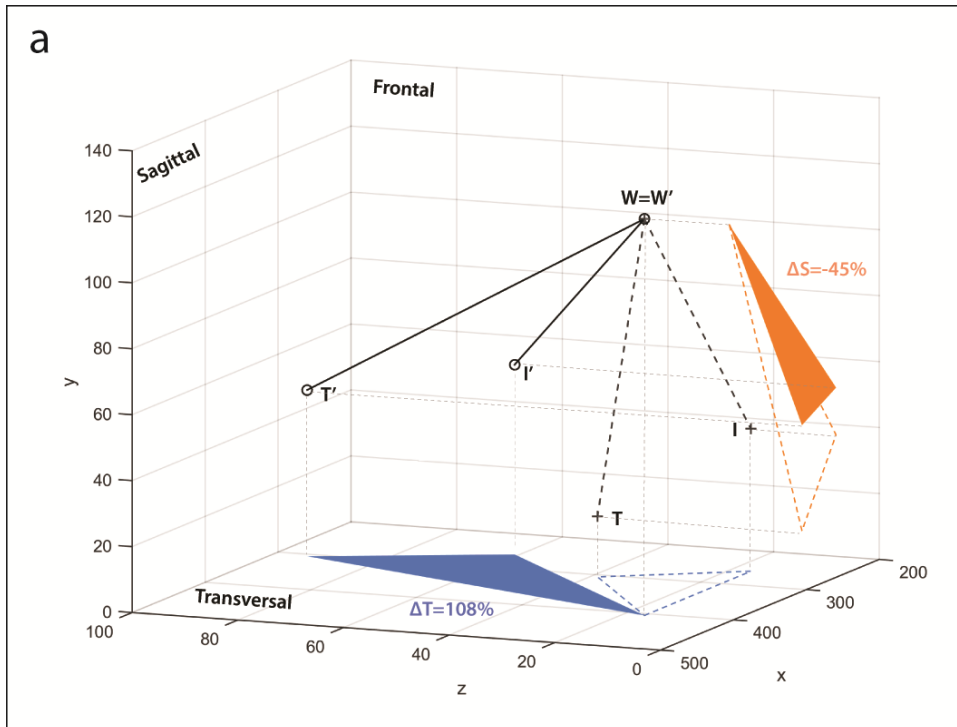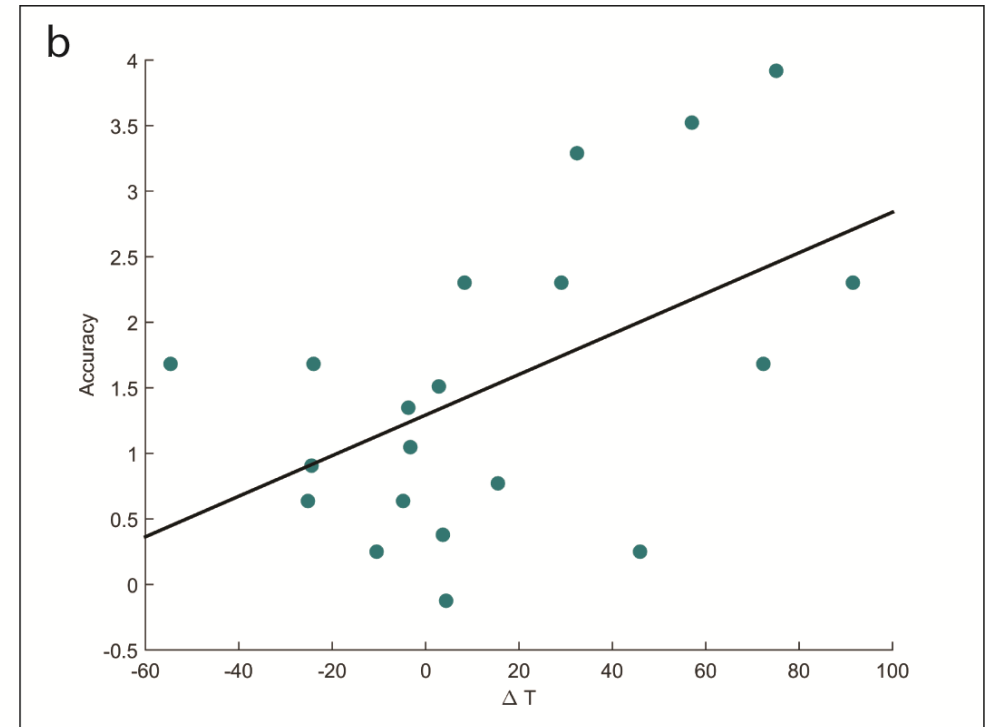

**Figure S4: (a)** example of two different prehensions, one longitudinal and one more lateral, estimated by the wrist, thumb and index markers ( $W$ ,  $I$  and  $T$ ) and seen from an egocentric perspective. Dashed lines represent the longitudinal prehension; the solid lines represent the more lateral position. The orange triangles represent the projection on the sagittal plane ( $xy$ ) of the hand, while the blue triangles are the projection on the transversal plane ( $xz$ ).  $\Delta S$  and  $\Delta T$  are the percentage difference between the area evaluated in the two position for the sagittal and trasversal plane, respectively. When moving from a longitudinal to a more lateral position,  $\Delta S$  is reduced, while  $\Delta T$  increased. **(b)** Correlation between  $\Delta T$  relative to the SB-SS condition and recognition accuracy ( $r=0.52$ ;  $p=0.02$ ).
